# Supplementary material for: Preparation of a novel palladium catalytic hydrogel based on graphene oxide/chitosan NPs and cellulose nanowhiskers
Source: Royal Society of Chemistry journal article supplement (doi:10.1039/c8ra06623j), 2018-01-01
Supplement: c8ra06623j1.pdf [file c8ra06623j1.pdf]

1 **Preparation a novel palladium catalytic hydrogel based on graphene oxide/ chitosan NPs**  
2 **and cellulose nanowhiskers biopolymers**

3 Samira Ashiri<sup>a</sup>, Ebrahim Mehdipour<sup>a\*</sup>

4 Department of Chemistry, Faculty of Science, Lorestan University, Khoramabad, Iran.  
5 \* Corresponding Author: E. Mehdipour; E-mail: mehdipour.e@lu.ac.ir; Tel-Fax: +98 66 331206.

6

7 Since the palladium nanoparticles were synthesized in-situ in the hydrogel, there was no possibility of  
8 obtaining DLS analysis for palladium nanoparticles, and the only way to measure was SEM measurement  
9 software. One of SEM images containing the particle size, shown in Fig. S1a. The size of the  
10 nanoparticles was about 100-128 nm by SEM measurement software. Also shown in the Fig.1Sb  
11 synthesized Palladium nanoparticles have an octahedral and multifaceted structure, as a result, we can  
12 say that more surfaces are available and increased catalytic activity.

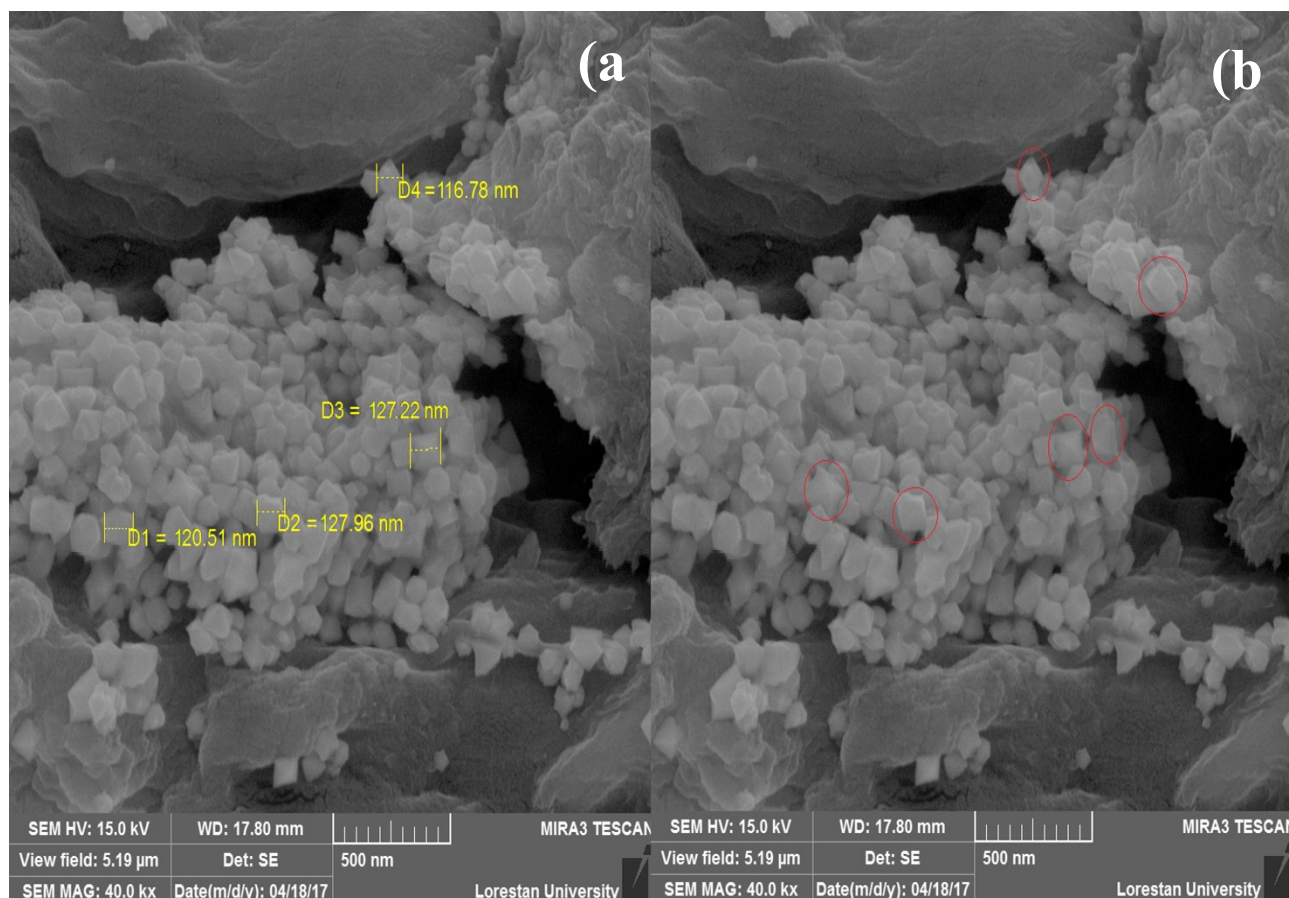

14 S1: FE-SEM images Palladium NPs in the hydrogel a) The size of the nanoparticles by SEM measurement  
15 software, b) Palladium nanoparticle octahedral and multifaceted structure

16

17

18

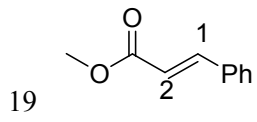

Sample code: 1 (omidi-Dr.abdoli)

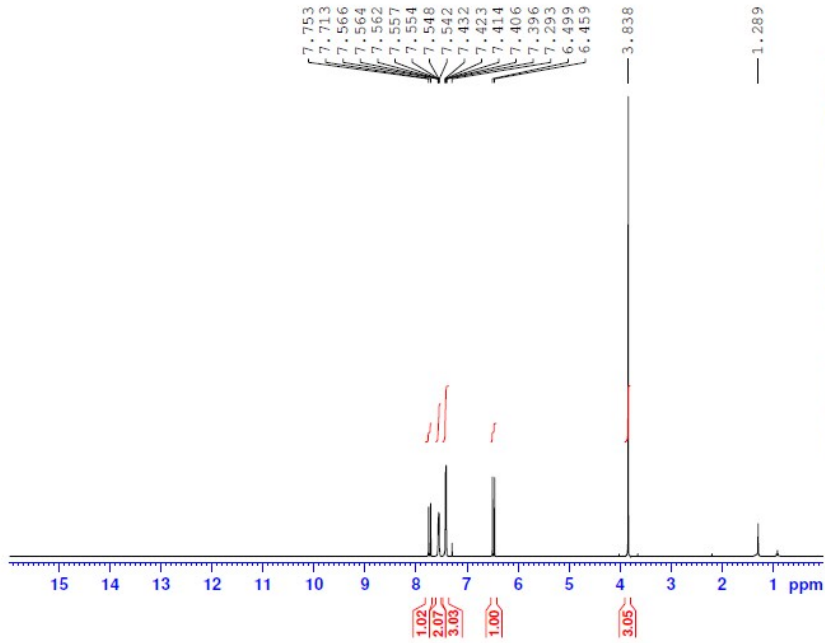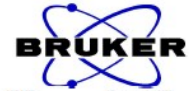

NAME Yasooj UN  
EXPNO 725  
PROCNO 1  
Date\_ 20160201  
Time 9.49  
INSTRUM spect  
PROBHD 5 mm PABBO BB-  
PULPROG zg30  
TD 65536  
SOLVENT CDCl3  
NS 20  
DS 0  
SWH 8012.820 Hz  
FIDRES 0.122266 Hz  
AQ 4.0894966 sec  
RG 71.8  
DW 62.400 usec  
DE 6.50 usec  
TE 294.2 K  
D1 4.0000000 sec  
TDO 1

==== CHANNEL f1 =====  
NUC1 1H  
P1 14.00 usec  
PL1 -2.00 dB  
PL1W 11.86358406 W  
SFO1 400.2236020 MHz  
SI 32768  
SF 400.2200000 MHz  
WDW EM  
SSB 0  
LB 0.30 Hz  
GB 0  
PC 1.00

20

21

22

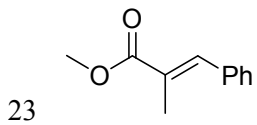

Sample code: 1 (omidi-Dr.abdoli)

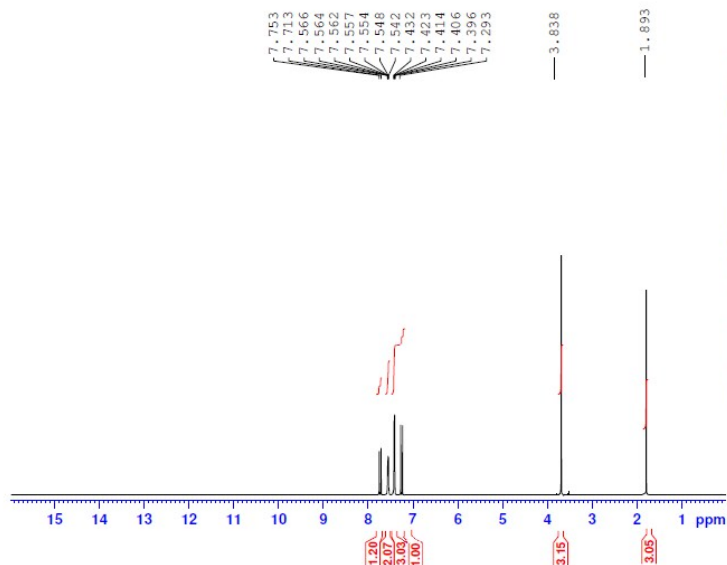

**BRUKER**

NAME Yasooj UN  
EXPNO 725  
PROCNO 1  
Date\_ 20160201  
Time 9.48  
INSTRUM spect  
PROBHD 5 mm PABBO BH-  
PULPROG zg30  
TD 65536  
SOLVENT CDCl3  
NS 20  
DS 0  
SWH 8012.820 Hz  
FIDRES 0.122266 Hz  
AQ 4.0894966 sec  
RG 71.8  
DW 62.400 usec  
DE 6.50 usec  
TE 294.2 K  
D1 4.00000000 sec  
TDO 1

===== CHANNEL f1 =====  
NUC1 1H  
P1 14.00 usec  
PL1 -2.00 dB  
PLW 11.86359406 W  
SF01 400.2236020 MHz  
SI 32768  
SF 400.2200000 MHz  
WDW EM  
SSB 0  
LB 0.30 Hz  
GB 0  
PC 1.00

24

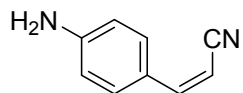

25

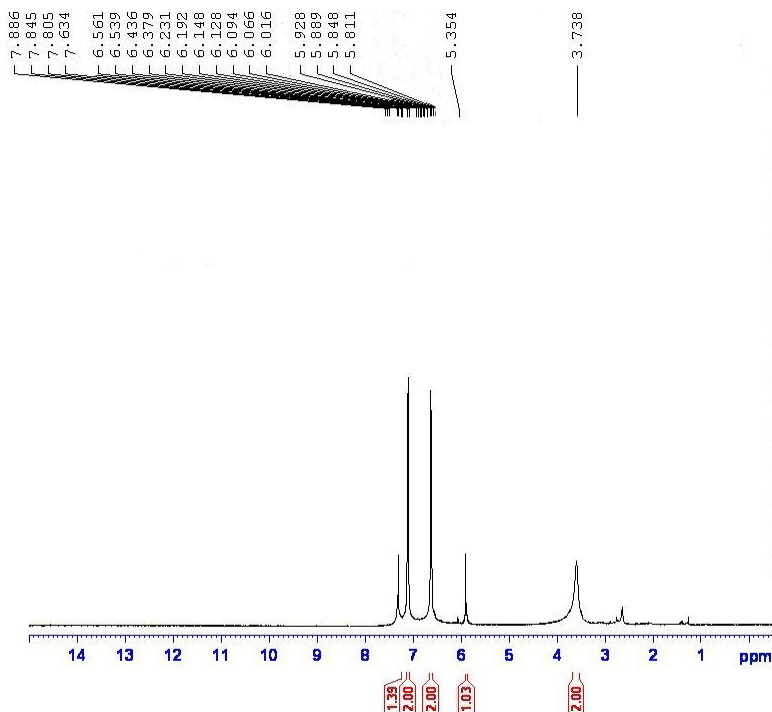

**BRUKER**

Current Data Parameters  
NAME 3H-4  
EXPNO 1285  
PROCNO 1

F2 - Acquisition Parameters  
Date\_ 20160917  
Time 13.25  
INSTRUM spect  
PROBHD 5 mm Multinu  
PULPROG zg  
TD 32768  
SOLVENT CDCl3  
NS 16  
DS 0  
SWH 8012.820 Hz  
FIDRES 0.244532 Hz  
AQ 2.0447731 sec  
RG 1824.6  
DW 62.400 usec  
DE 6.00 usec  
TE 300.0 K  
D1 5.00000000 sec

===== CHANNEL f1 =====  
NUC1 1H  
P1 15.00 usec  
PL1 -6.00 dB  
SF01 400.1336012 MHz

F2 - Processing parameters  
SI 32768  
SF 400.1300065 MHz  
WDW EM  
SSB 0  
LB 0.30 Hz  
GB 0  
PC 1.00

26

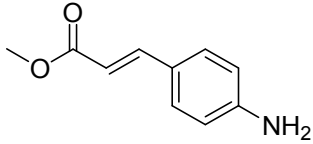

27

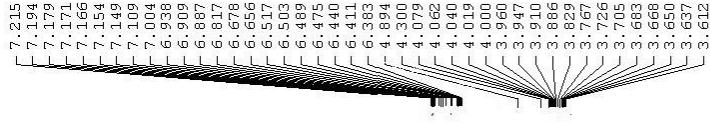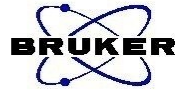

```

Current Data Parameters
NAME          3H-4
EXPNO         1279
PROCNO        1

F2 - Acquisition Parameters
Date_         20160917
Time          12.15
INSTRUM       spect
PROBHD        5 mm Multinu
PULPROG       zg
TD             32768
SOLVENT       CDCl3
NS            16
DS             0
SWH           8012.820 Hz
FIDRES        0.244532 Hz
AQ            2.0447731 sec
RG            2580.3
DW            62.400 usec
DE            6.00 usec
TE            300.0 K
D1            5.00000000 sec

===== CHANNEL f1 =====
NUC1           1H
P1             15.00 usec
PL1            -6.00 dB
SFO1          400.1336012 MHz

F2 - Processing parameters
SI             32768
SF            400.1330065 MHz
WDW            EM
SSB            0
LB             0.30 Hz
GB             0
PC             1.00
  
```

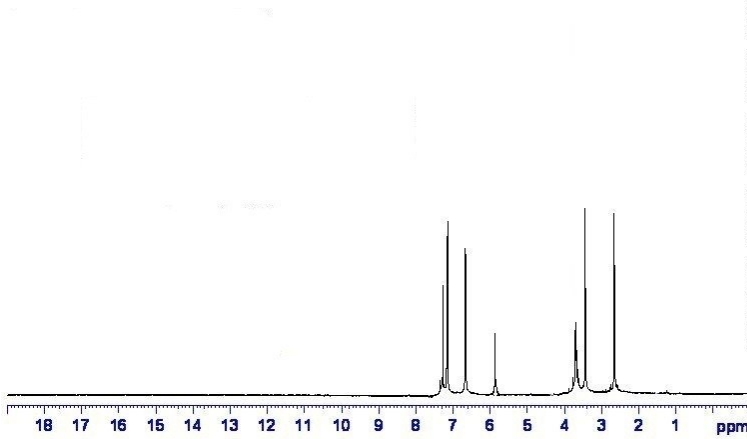

28

29

30

31

32

33

34

35

36

37

38

39

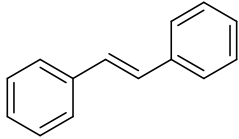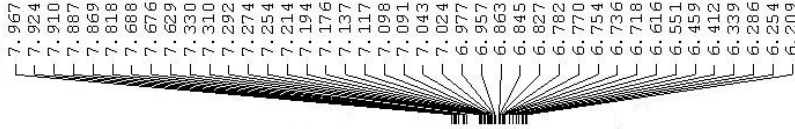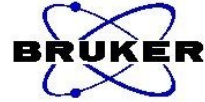

Current Data Parameters  
 NAME 3H-4  
 EXPNO 1247  
 PROCNO 1

F2 - Acquisition Parameters  
 Date\_ 20160913  
 Time 10.08  
 INSTRUM spect  
 PROBHD 5 mm Multinu  
 PULPROG zg  
 TD 32768  
 SOLVENT DMSO  
 NS 16  
 DS 0  
 SWH 8012.820 Hz  
 FIDRES 0.244532 Hz  
 AQ 2.0447731 sec  
 RG 1625.5  
 DW 62.400 usec  
 DE 6.00 usec  
 TE 300.0 K  
 D1 5.0000000 sec

===== CHANNEL f1 =====  
 NUC1 1H  
 P1 15.00 usec  
 PL1 -6.00 dB  
 SFO1 400.1336012 MHz

F2 - Processing parameters  
 SI 32768  
 SF 400.1300065 MHz  
 WDW EM  
 SSB 0  
 LB 0.30 Hz  
 GB 0  
 PC 1.00

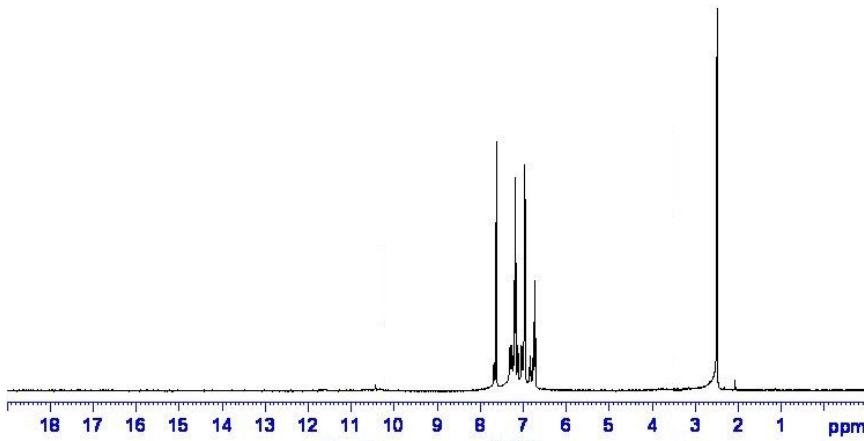

1.27  
1.34  
2.08  
1.39  
2.85  
2.66  
1.26

40

41

42

43

44

45

46

47

48

49

50

51

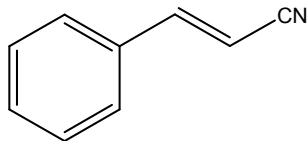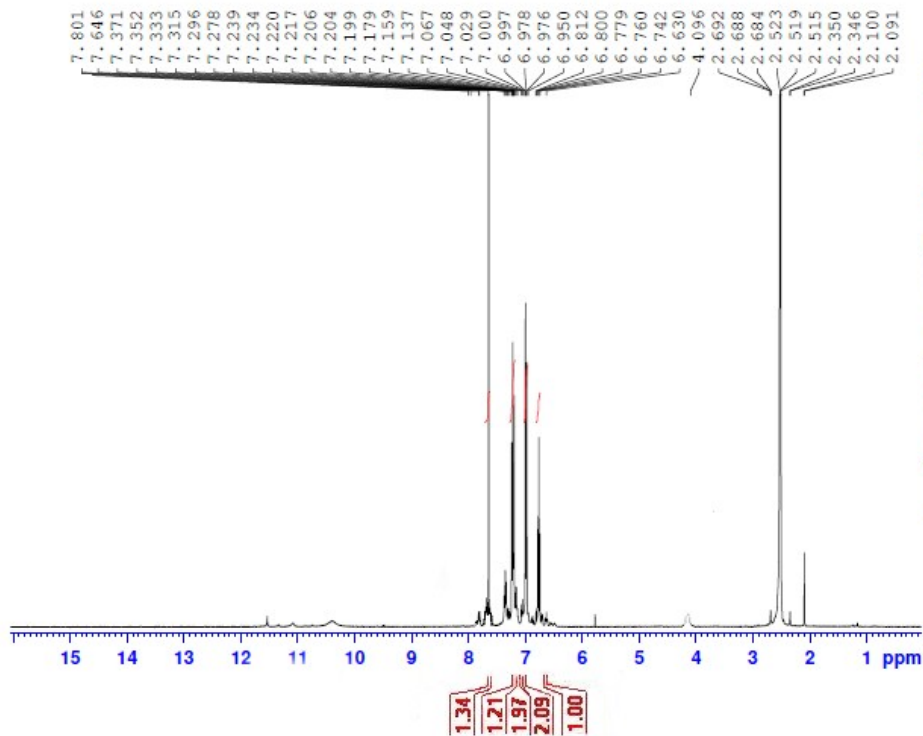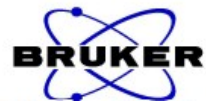

NAME Yasooj UN  
EXPNO 724  
PROCNO 1  
Date\_ 21240201  
Time 9.05  
INSTRUM spect  
PROBHD 5 mm PABBO BB-  
PULPROG zg30  
TD 65536  
SOLVENT DMSO  
NS 20  
DS 0  
SWH 8012.820 Hz  
FIDRES 0.122266 Hz  
AQ 4.0894966 sec  
RG 256  
DW 62.400 usec  
DE 6.50 usec  
TE 294.2 K  
D1 4.0000000 sec  
TDO 1

==== CHANNEL f1 =====  
NUC1 1H  
P1 14.00 usec  
PL1 -2.00 dB  
PL1W 11.86359406 W  
SFO1 400.2236020 MHz  
SI 32768  
SF 400.2200000 MHz  
WUW EM  
SEB 0  
LB 0.30 Hz  
GB 0  
PC 1.00

52

53

54
